# Supplementary material for: Genomic Characterization and Molecular Detection of Rehmannia Allexivirus Virus, a Novel Allexivirus Infecting Rehmannia glutinosa
Source: MDPI journal article supplement (doi:10.3390/microorganisms12050844), 2024-04-23
Supplement: s1 [file s1]

Table S2 Compound infection statistics of 5 known viruses and 4 pairs of detection primers (ReAV rep-1F/R, ReAVrep-2F/R, ReAV CP-1F/R, and ReAV CP-2F/R) of ReAV from 60 samples of *Rehmannia glutinosa*

[illegible]

|    |   |   |   |   |   |   |   |   |   |   |
|----|---|---|---|---|---|---|---|---|---|---|
| 21 | - | + | + | + | + | - | - | + | + | 5 |
| 22 | - | + | + | + | + | + | + | + | + | 5 |
| 23 | - | + | + | + | - | - | - | - | + | 4 |
| 24 | - | - | + | + | - | - | - | + | - | 3 |
| 25 | + | + | + | + | - | - | - | + | - | 5 |
| 26 | + | + | + | + | - | - | - | - | - | 4 |
| 27 | - | + | + | + | + | - | - | + | - | 5 |
| 28 | - | + | + | + | + | + | + | + | + | 5 |
| 29 | - | + | + | + | + | + | + | + | + | 5 |
| 30 | - | - | + | + | + | + | + | + | + | 4 |
| 31 | - | + | + | + | + | + | + | + | + | 5 |
| 32 | + | + | + | + | + | + | + | + | + | 6 |
| 33 | - | + | + | - | - | + | - | - | - | 3 |
| 34 | - | + | + | + | + | + | + | + | + | 5 |
| 35 | - | + | + | + | + | + | + | + | + | 5 |
| 36 | - | + | + | + | + | + | + | + | + | 5 |
| 37 | - | + | + | + | + | + | + | + | + | 5 |
| 38 | - | + | + | + | + | + | + | + | + | 5 |
| 39 | + | - | + | + | + | + | + | + | + | 5 |
| 40 | + | - | + | + | + | + | + | + | + | 5 |
| 41 | + | - | + | + | + | + | + | + | + | 5 |
| 42 | + | - | + | + | + | + | - | + | + | 6 |
| 43 | + | + | + | + | - | + | + | + | - | 6 |
| 44 | + | - | + | + | + | + | + | + | + | 5 |
| 45 | + | - | + | + | + | + | + | - | - | 5 |

|                                     |    |    |    |    |    |    |    |    |    |   |
|-------------------------------------|----|----|----|----|----|----|----|----|----|---|
| 46                                  | -  | -  | +  | +  | -  | +  | -  | +  | -  | 3 |
| 47                                  | -  | +  | +  | +  | +  | +  | +  | +  | +  | 5 |
| 48                                  | -  | -  | +  | +  | +  | +  | +  | +  | +  | 4 |
| 49                                  | +  | +  | +  | +  | +  | +  | +  | +  | +  | 6 |
| 50                                  | -  | +  | +  | +  | +  | +  | +  | +  | +  | 5 |
| 51                                  | -  | +  | +  | +  | +  | +  | +  | +  | +  | 5 |
| 52                                  | +  | +  | +  | +  | +  | +  | +  | +  | +  | 6 |
| 53                                  | -  | -  | +  | +  | +  | +  | +  | +  | +  | 4 |
| 54                                  | -  | +  | +  | -  | +  | +  | +  | +  | +  | 4 |
| 55                                  | +  | +  | +  | -  | +  | +  | +  | +  | +  | 5 |
| 56                                  | +  | +  | +  | -  | +  | -  | +  | +  | +  | 5 |
| 57                                  | -  | +  | +  | +  | +  | +  | +  | +  | +  | 5 |
| 58                                  | +  | +  | +  | +  | +  | +  | +  | +  | +  | 6 |
| 59                                  | +  | +  | +  | +  | +  | +  | +  | +  | +  | 6 |
| 60                                  | +  | +  | +  | +  | +  | +  | +  | +  | +  | 6 |
| Number<br>of<br>positive<br>samples | 22 | 47 | 60 | 56 | 51 | 47 | 44 | 49 | 49 |   |

Note: “+” represents positive sample, “-” represents positive sample.
