# Supplementary material for: Genomic Characterization and Molecular Detection of Rehmannia Allexivirus Virus, a Novel Allexivirus Infecting Rehmannia glutinosa
Source: MDPI journal article supplement (doi:10.3390/microorganisms12050844), 2024-04-23
Supplement: s1 [file s1]

Table S1 Primers used for the amplification of genome sequences of ReAV-20, 29, 31, 49, 52, 53, 55, 58, and 59 from *Rehmannia glutinosa*

| fragment | primer      | Sequence (5'-3')       | Position (nt) | Size (bp) |
|----------|-------------|------------------------|---------------|-----------|
| 1        | 5'RACE      | CTAATACGACTCACTATAGGGC | 1-22          | 395       |
|          | ReAV-390R   | TGCCGTGTCCAGCCAGTTGAG  | 374-395       |           |
| 2        | ReAV -440F  | CACGAACCTAAAGACGTCCT   | 71-91         | 1047      |
|          | ReAV-1380R  | TCGTCTGATTCAAGCCCGTCAC | 997-1118      |           |
| 3        | ReAV -1260F | TCGTGGGACAAGCCTCCTACTC | 886-907       | 1608      |
|          | ReAV -2670R | GTGTTGACCAGCGTGATGGT   | 2475-2494     |           |
| 4        | ReAV -2490F | TCCTGCAAATCACAAGAGACGC | 2313-2334     | 1060      |
|          | ReAV -3560R | AGTTCGAAATTGAGGAAGGC   | 3354-3373     |           |
| 5        | ReAV -3300F | CGAGAAAGTCGGGTTCAAGTTC | 3107-3128     | 1204      |
|          | ReAV -4500R | GTGTGCGAGGCAAGCTCCTGTG | 4290-4311     |           |
| 6        | ReAV -4240F | GGCCATTTCTCTGACCACAAC  | 4049-4070     | 1290      |
|          | ReAV -5530R | GCCACGCGCCCAAGCAGGCTAG | 5318-5339     |           |
| 7        | ReAV -5340F | TCGTCATTACGGGATCTACCGT | 5149-5170     | 1021      |
|          | ReAV -6360R | GCCAACGCGTCTGCGGGCAG   | 6151-6170     |           |
| 8        | ReAV -6120F | CCACACCATCCAACGGCGGC   | 5926-5945     | 1045      |
|          | ReAV -7100R | GCTGGCGTGATTCCACGATGGC | 6950-6971     |           |
| 9        | ReAV -6610F | GCTACGTCCTCGGCAAGAAGAC | 6756-6777     | 520       |
|          | oligodT     | -----                  |               |           |
